# Supplementary material
Source: publisher site journal article supplement (https://www.dovepress.com/article/305066)
Supplement: Supplementary file 1 [file get_supplementary_file.php]

# Supplementary Table 1: Ethics committee

| Investigator Name/ Site Number | Ethics Review Board’s  Name and Address |
| --- | --- |
| Bonner/101 | Quorum Review, Inc.1501 Fourth AvenueSuite 800Seattle WA 98101United States |
| Millen/103 | Quorum Review, Inc.1501 Fourth AvenueSuite 800Seattle WA 98101United States |
| Stickler/104 | Quorum Review, Inc.1501 Fourth AvenueSuite 800Seattle WA 98101United States |
| Markley/109 | Quorum Review, Inc.1501 Fourth AvenueSuite 800Seattle WA 98101United States |
| Saper/110 | Quorum Review, Inc.1501 Fourth AvenueSuite 800Seattle WA 98101United States |
| Turner/111 | Quorum Review, Inc.1501 Fourth AvenueSuite 800Seattle WA 98101United States |
| Mechtler/112 | Quorum Review, Inc.1501 Fourth AvenueSuite 800Seattle WA 98101United States |
| Kudrow/113 | Quorum Review, Inc.1501 Fourth AvenueSuite 800Seattle WA 98101United States |
| Hindiyeh/114 | Stanford University Hospital3000 El Camino Real,Five Palo Alto Square 4th FlrPalo Alto CA 94306United States |
| Kalidas/116 | Quorum Review, Inc.1501 Fourth AvenueSuite 800Seattle WA 98101United States |
| McAllister/120 | Quorum Review, Inc.1501 Fourth AvenueSuite 800Seattle WA 98101United States |
| Riesenberg/122 | Quorum Review, Inc.1501 Fourth AvenueSuite 800Seattle WA 98101United States |
| Khan/128 | Quorum Review, Inc.1501 Fourth AvenueSuite 800Seattle WA 98101United States |
| Gawel/200 | IRB Services372 Hollandview TrailAurora Ontario L4G 0A5Canada |
| Schoenen/300 | Universitair Ziekenhuis GentCorneel Heymanslaan 10Commissie voor Medische EthiekGent 9000Belgium |
| Jensen/400 | De Videnskabsetiske Komiteer for Region HovedstadenCenter for SundhedKongens Vænge 2Hillerød 3400Denmark |
| Nissilä/501 | Tukija, ValviraPL 210Helsinki 00281Finland |
| Ilmavirta/502 | Tukija, ValviraPL 210Helsinki 00281Finland |
| Holle-Lee/600*AUG2016 – present*Solbach/600*OCT2015 – AUG2016*Hagenacker/600*FEB2015 – SEP2015* | Ethik-Kommission der Medizinischen Fakultät derUniversität Duisburg-EssenRobert-Koch-Straße 9-11,Essen, Nordrhein-Westfalen 45147Germany |
| May/601 | Ethik-Kommission der Medizinischen Fakultät derUniversität Duisburg-EssenRobert-Koch-Straße 9-11,Essen, Nordrhein-Westfalen 45147Germany |
| Straube/602 | Ethik-Kommission der Medizinischen Fakultät derUniversität Duisburg-EssenRobert-Koch-Straße 9-11,Essen, Nordrhein-Westfalen 45147Germany |
| Gaul/603 | Ethik-Kommission der Medizinischen Fakultät derUniversität Duisburg-EssenRobert-Koch-Straße 9-11,Essen, Nordrhein-Westfalen 45147Germany |
| Lainez/700 | Hospital Universitari Vall d’HebronPasseig Vall d’Hebron, 119-129Comité Ético de Investigación ClínicaBarcelona Barcelona 08035Spain |
| Pozo Rosich/701 | Hospital Universitari Vall d’HebronPasseig Vall d’Hebron, 119-129Comité Ético de Investigación ClínicaBarcelona Barcelona 08035Spain |
| Rogelio Leira Muiño/702 | Hospital Universitari Vall d’HebronPasseig Vall d’Hebron, 119-129Comité Ético de Investigación ClínicaBarcelona Barcelona 08035Spain |
| Ahmed/802 | NRES Committee London - City & EastBristol REC Centre, WhitefriarsLevel 3, Block B, Lewins MeadBristol Avon BS1 2NTUnited Kingdom |
| Fakas/850 | National Ethics Committee284, Mesogion AveAthens Holargos 155 62Greece |
| Mitsikostas/851 | National Ethics Committee284, Mesogion AveAthens Holargos 155 62Greece |
| Roos/900 | CPP Sud Mediterannée V4, Avenue Reine Victoria CS 91179CHU - Hopital de Cimiez, Bât Grand Hotel, 5emeNice Cedex 1 06003France |
| Lanteri-Minet/901 | CPP Sud Mediterannée V4, Avenue Reine Victoria CS 91179CHU - Hopital de Cimiez, Bât Grand Hotel, 5emeNice Cedex 1 06003France |
| Leone/950 | Comitato Etico Regione Lombardia – Istituto Carlo BestaVia Celoria, 11Milano 20133Italy |
| Geppetti/951 | Comitato Etico Area Vasta Centro Presso AOU CareggiL.go Brambilla 3Firenze Firenze 50134Italy |
| Tassorelli/952 | Comitato di IRCCS Policlinico S. Matteo di PaviaViale Golgi, 19Pavia Pavia 27100Italy |
| Couturier/975 | METC Brabantdr. Deelenlaan 9gebouw HasseltvesteTilburg 5042 ADNetherlands |
| Mulleners/976 | METC Brabantdr. Deelenlaan 9gebouw HasseltvesteTilburg 5042 ADNetherlands |
